# Supplementary material for: Cardiac Intervention Improves Heart Disease and Clinical Outcomes in Patients With Muscular Dystrophy in a Multidisciplinary Care Setting
Source: PubMed Central journal article supplement — J Am Heart Assoc. 2020 Jan 14;9(2):e014004. doi: 10.1161/JAHA.119.014004 (PMC7033817; doi:10.1161/jaha.119.014004), 2020-01-14
Supplement: JAH3-9-e014004-s001.pdf [file JAH3-9-e014004-s001.pdf]

# **Supplemental Material**

**Table S1. Structural Evaluation of the Mitral, Tricuspid, Aortic, and Pulmonic Valves by Cohort.\***

|                 | <b>Dystrophinopathies<br/>(n=23)</b>  | <b>LGMD<br/>(n=21)</b> | <b>DM1<br/>(n=50)</b> | <b>FSHD<br/>(n=12)</b> |
|-----------------|---------------------------------------|------------------------|-----------------------|------------------------|
| Mitral Valve    | 1 Mild Thickening,<br>2 Mild Prolapse | 1 Mild Thickening      | Normal                | 1 Mild Thickening      |
| Tricuspid Valve | Normal                                | Normal                 | Normal                | Normal                 |
| Aortic Valve    | Normal                                | Normal                 | Normal                | Normal                 |
| Pulmonic Valve  | Normal                                | Normal                 | Normal                | Normal                 |

DM1 indicates type 1 myotonic dystrophy; FSHD, facioscapulohumeral muscular dystrophy; and LGMD, limb-girdle muscular dystrophy. \*Data obtained from the 106 patients that received an echocardiogram study at baseline.

**Table S2. Comparing 12-Lead Electrocardiogram and Systolic Function Data of Type 1 Myotonic Dystrophy Patients with Type 2 Myotonic Dystrophy Patients.\***

|                              | <b>DM1 (n=60)</b> | <b>DM2 (n=7)</b>  | <b>P Value</b> |
|------------------------------|-------------------|-------------------|----------------|
| Heart Rate, bpm              | 68 (63.3-75)      | 69.5 (66-74.5)    | 0.61           |
| PR Interval, ms              | 193 (178.3-223)   | 152 (144.5-173.5) | 0.01           |
| QRS Duration, ms             | 107 (96-118)      | 92 (86-95.5)      | 0.02           |
| QT <sub>c</sub> Interval, ms | 412 (396-440)     | 399.5 (393-409.8) | 0.37           |
| 1° AVB                       | 18 (30)           | 0                 |                |
| LAFB                         | 11 (18.3)         | 0                 |                |
| LBBB                         | 6 (10)            | 0                 |                |
| LVEF, %                      | 55 (50-60)        | 60 (51.3-60)      | 0.52           |

1° AVB indicates first-degree atrioventricular block; DM1, type 1 myotonic dystrophy; DM2, type 2 myotonic dystrophy; LAFB, left anterior fascicular block; LBBB, left bundle branch block; LVEF, left ventricular ejection fraction; PR Interval, duration of atrial depolarization; QRS Duration, duration of ventricular depolarization; and QT<sub>c</sub> Interval, corrected duration between ventricular depolarization and repolarization. \*12-lead electrocardiogram data was obtained from all 67 patients. Echocardiogram data was obtained from 54 patients (50 DM1 and four DM2 patients).

**Table S3. Defined Maximum Tolerated Dose of Medications.\***

| <b>Drug</b> | <b>Maximal Dose (mg)</b> |  | <b>Drug</b>          | <b>Maximal Dose (mg)</b> |
|-------------|--------------------------|--|----------------------|--------------------------|
| <b>ACEi</b> |                          |  | <b>Beta-Blockers</b> |                          |
| Enalapril   | 20                       |  | Bisoprolol           | 10                       |
| Lisinopril  | 40                       |  | Carvedilol           | 50                       |
| Perindopril | 8                        |  | Metoprolol           | 200                      |
| Ramipril    | 10                       |  |                      |                          |
|             |                          |  |                      |                          |
| <b>ARB</b>  |                          |  | <b>MRA</b>           |                          |
| Candesartan | 32                       |  | Spironolactone       | 50                       |
| Irbesartan  | 300                      |  |                      |                          |
| Telmisartan | 80                       |  |                      |                          |
| Valsartan   | 320                      |  |                      |                          |

ACEi indicates angiotensin converting enzyme inhibitor; ARB, angiotensin receptor blocker; and MRA, mineralocorticoid receptor antagonist. \*Maximal dose defined as per the 2016 American Heart Association Guidelines.<sup>1</sup>

**Figure S1. Prevalence of myocardial fibrosis based on cardiac magnetic resonance imaging (MRI).**

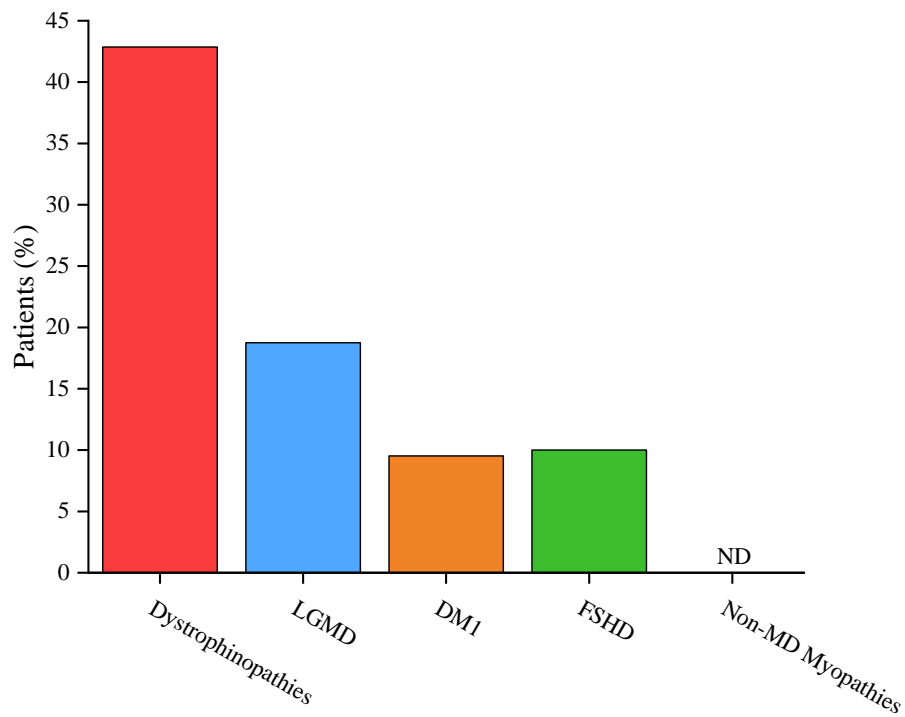

Patients screened by cardiac MRI that showed fibrosis as visualized by late gadolinium enhancement. DM1 indicates type 1 myotonic dystrophy; FSHD, facioscapulohumeral muscular dystrophy; LGMD, limb-girdle muscular dystrophy; and ND, not detected.

**Supplemental Reference:**

1. Yancy CW, Jessup M, Bozkurt B, Butler J, Casey DE, Colvin MM, Drazner MH, Filippatos G, Fonarow GC, Givertz MM, Hollenberg SM, Lindenfeld J, Masoudi FA, McBride PE, Peterson PN, Stevenson LW, Westlake C. 2016 ACC/AHA/HFSA Focused Update on New Pharmacological Therapy for Heart Failure: An Update of the 2013 ACCF/AHA Guideline for the Management of Heart Failure. *A Report of the American College of Cardiology/American Heart Association Task Force on Clinical Practice Guidelines and the Heart Failure Society of America.* 2016;68:1476-1488.
